# Supplementary material for: Fossilized Venom: The Unusually Conserved Venom Profiles of Heloderma Species (Beaded Lizards and Gila Monsters)
Source: MDPI journal article supplement (doi:10.3390/toxins6123582), 2014-12-22
Supplement: s2 [file s2]

## Sheet: Exa
%Cov	%Cov(50)	%Cov(95)	Accession	Name	Species	Peptides(95%)
40.310001373291	39.8000001907349	39.8000001907349	tr|E8ZCG5|E8ZCG5_HELHR	Natriuretic peptide OS=Heloderma horridum GN=hkn-3 PE=2 SV=1	HELHR	78
31.0900002717972	23.3199998736382	18.129999935627	tr|E3T904|E3T904_HELHR	Nerve growth factor beta polypeptide (Fragment) OS=Heloderma horridum GN=NGFB PE=4 SV=1	HELHR	4
33.7099999189377	25.2799987792969	19.6600005030632	tr|C6EVG8|C6EVG8_HELSC	NGF toxin (Fragment) OS=Heloderma suspectum cinctum PE=2 SV=1	HELSC	4
51.0500013828278	44.760000705719	44.760000705719	sp|P16354|PA23_HELSU	Phospholipase A2 isozymes PA3A/PA3B/PA5 OS=Heloderma suspectum PE=1 SV=3	HELSU	49
47.6200014352798	38.1000012159348	38.1000012159348	tr|C6EVG9|C6EVG9_HELSC	Type III phospholipase A2 toxin 1 OS=Heloderma suspectum cinctum PE=2 SV=1	HELSC	29
20.2500000596046	11.9800001382828	7.43800029158592	tr|C6EVG0|C6EVG0_HELSC	CRISP toxin OS=Heloderma suspectum cinctum PE=2 SV=1	HELSC	2
20.2500000596046	11.9800001382828	7.43800029158592	sp|Q91055|CRVP_HELHO	Cysteine-rich venom protein helothermine OS=Heloderma horridum horridum PE=1 SV=1	HELHO	2
44.7400003671646	44.7400003671646	44.7400003671646	sp|P0DJ94|EXE1_HELHO	Exendin-1 OS=Heloderma horridum horridum PE=1 SV=1	HELHO	1
44.7400003671646	44.7400003671646	44.7400003671646	sp|P04203|EXE1_HELSU	Exendin-1 OS=Heloderma suspectum PE=1 SV=1	HELSU	1
66.6700005531311	66.6700005531311	66.6700005531311	sp|P20394|EXE3_HELHO	Exendin-3 OS=Heloderma horridum horridum PE=1 SV=2	HELHO	13
45.4499989748001	39.860001206398	39.860001206398	tr|C6EVG3|C6EVG3_HELSC	Hyaluronidase (Fragment) OS=Heloderma suspectum cinctum PE=2 SV=1	HELSC	10
32.1599990129471	32.1599990129471	21.9600006937981	tr|C6EVG4|C6EVG4_HELSC	Kallikrein toxin 1 OS=Heloderma suspectum cinctum PE=2 SV=1	HELSC	16

## Sheet: Hor
%Cov	%Cov(50)	%Cov(95)	Accession	Name	Species	Peptides(95%)
48.4699994325638	48.4699994325638	39.8000001907349	tr|E8ZCG5|E8ZCG5_HELHR	Natriuretic peptide OS=Heloderma horridum GN=hkn-3 PE=2 SV=1	HELHR	66
58.7400019168854	52.4500012397766	48.2499986886978	sp|P16354|PA23_HELSU	Phospholipase A2 isozymes PA3A/PA3B/PA5 OS=Heloderma suspectum PE=1 SV=3	HELSU	55
44.8300004005432	44.8300004005432	44.8300004005432	sp|P20394|EXE3_HELHO	Exendin-3 OS=Heloderma horridum horridum PE=1 SV=2	HELHO	12
13.7299999594688	13.7299999594688	10.1999998092651	tr|C6EVG4|C6EVG4_HELSC	Kallikrein toxin 1 OS=Heloderma suspectum cinctum PE=2 SV=1	HELSC	7
100	100	100	sp|P0DJ94|EXE1_HELHO	Exendin-1 OS=Heloderma horridum horridum PE=1 SV=1	HELHO	7
100	100	100	sp|P04203|EXE1_HELSU	Exendin-1 OS=Heloderma suspectum PE=1 SV=1	HELSU	7
47.1799999475479	45.770001411438	45.770001411438	sp|P80003|PA2A2_HELSU	Acidic phospholipase A2 PA4 OS=Heloderma suspectum PE=1 SV=2	HELSU	42
44.9000000953674	43.5400009155273	38.7800008058548	tr|C6EVG9|C6EVG9_HELSC	Type III phospholipase A2 toxin 1 OS=Heloderma suspectum cinctum PE=2 SV=1	HELSC	24
11.9800001382828	11.9800001382828	7.43800029158592	tr|C6EVG0|C6EVG0_HELSC	CRISP toxin OS=Heloderma suspectum cinctum PE=2 SV=1	HELSC	1
11.9800001382828	11.9800001382828	7.43800029158592	sp|Q91055|CRVP_HELHO	Cysteine-rich venom protein helothermine OS=Heloderma horridum horridum PE=1 SV=1	HELHO	1
42.6999986171722	42.6999986171722	33.1499993801117	tr|D7FB57|D7FB57_HELSU	Natriuretic peptide OS=Heloderma suspectum GN=hkn-2 PE=2 SV=1	HELSU	59
42.6999986171722	42.6999986171722	33.1499993801117	sp|C6EVG7|VNHP_HELSC	Natriuretic and helokinestatin peptides OS=Heloderma suspectum cinctum PE=1 SV=1	HELSC	59
21.7600002884865	13.4700000286102	13.4700000286102	tr|E3T904|E3T904_HELHR	Nerve growth factor beta polypeptide (Fragment) OS=Heloderma horridum GN=NGFB PE=4 SV=1	HELHR	3
13.4700000286102	13.4700000286102	13.4700000286102	tr|E3T905|E3T905_HELSU	Nerve growth factor beta polypeptide (Fragment) OS=Heloderma suspectum GN=NGFB PE=4 SV=1	HELSU	3
14.6099999547005	14.6099999547005	14.6099999547005	tr|C6EVG8|C6EVG8_HELSC	NGF toxin (Fragment) OS=Heloderma suspectum cinctum PE=2 SV=1	HELSC	3

## Sheet: Susp
%Cov	%Cov(50)	%Cov(95)	Accession	Name	Species	Peptides(95%)
17.58	9.31	13.117	tr|C6EVG0|C6EVG0_HELSC	CRISP toxin OS=Heloderma suspectum cinctum PE=2 SV=1	HELSC	4
50.419	42.07	42.07	sp|P04203|EXE1_HELSU	Exendin-1 OS=Heloderma suspectum PE=1 SV=1	HELSU	5
31.04	22.61	34.3101	tr|C6EVG8|C6EVG8_HELSC	NGF toxin (Fragment) OS=Heloderma suspectum cinctum PE=2 SV=1	HELSC	10
75.6285	63.105	63.105	tr|C6EVG1|EXE4_HELSC	Exendin-4 OS=Heloderma suspectum cinctum PE=2 SV=2	HELSC	10
42.78	37.19	45.539	tr|C6EVG3|C6EVG3_HELSC	Hyaluronidase OS=Heloderma suspectum cinctum PE=2 SV=1	HELSC	15
37.839	37.839	27.639	tr|C6EVG4|C6EVG4_HELSC	Kallikrein toxin 1 OS=Heloderma suspectum cinctum PE=2 SV=1	HELSC	23
47.2601	42.09	42.09	sp|P16354|PA23_HELSU	Phospholipase A2 isozymes PA3A/PA3B/PA5 OS=Heloderma suspectum PE=1 SV=3	HELSU	35
44.95	35.43	35.43	tr|C6EVG9|C6EVG9_HELSC	Type III phospholipase A2 toxin 1 OS=Heloderma suspectum cinctum PE=2 SV=1	HELSC	45
37.64	36.0101	37.13	tr|E8ZCG5|E8ZCG5_HELHR	Natriuretic peptide OS=Heloderma horridum GN=hkn-3 PE=2 SV=1	HELHR	60
