# Supplementary material for: Fossilized Venom: The Unusually Conserved Venom Profiles of Heloderma Species (Beaded Lizards and Gila Monsters)
Source: MDPI journal article supplement (doi:10.3390/toxins6123582), 2014-12-22
Supplement: s3 [file s3]

## Sheet: Heloderma exasperatum
SPOT	%Cov	%Cov(50)	%Cov(95)	Uniprot matches	Toxin type	Peptides(95%)
2	12.389999628067	10.1099997758865	10.1099997758865	P43685, C6EVG4, C6EVG5	Kallikrein	127
3	37.0999991893768	30.6499987840652	30.6499987840652	P43685, C6EVG4, C6EVG5	Kallikrein	20
5	37.7499997615814	34.1399997472763	30.9199988842011	C6EVG3	Hyaluronidase	30
6	54.0300011634827	54.0300011634827	54.0300011634827	P43685, C6EVG4, C6EVG5	Kallikrein	85
7	54.0300011634827	50	50	P43685, C6EVG4, C6EVG5	Kallikrein	78
8	43.1499987840652	38.3100003004074	38.3100003004074	P43685, C6EVG4, C6EVG5	Kallikrein	29
9	29.2400002479553	26.8999993801117	26.8999993801117	C6EVG9, C6EVH0, P16354, P80003	Type III PLA2	73
13	32.6200008392334	32.6200008392334	32.6200008392334	P43685, C6EVG4, C6EVG5	Kallikrein	316
14	32.6200008392334	32.6200008392334	32.6200008392334	P43685, C6EVG4, C6EVG5	Kallikrein	329
15	32.6200008392334	32.6200008392334	32.6200008392334	P43685, C6EVG4, C6EVG5	Kallikrein	271
16	27.2100001573563	25.6399989128113	25.4999995231628			72
17	26.460000872612	26.460000872612	24.4100004434586	A0A087R2N4	BPI fold	42
21	44.650000333786	44.650000333786	44.650000333786	C6EVG0, Q91055	CRiSP	110

## Sheet: Heloderma horridum
N	%Cov	%Cov(50)	%Cov(95)	Uniprot matches	Toxin type	Peptides(95%)
1	58.0600023269653	57.6600015163422	57.260000705719	P43685, C6EVG4, C6EVG5	Kallikrein	99
2	57.260000705719	56.8499982357025	56.8499982357025	P43685, C6EVG4, C6EVG5	Kallikrein	124
3	52.4200022220612	42.739999294281	42.739999294281	P43685, C6EVG4, C6EVG5	Kallikrein	82
4	50	50	50	C6EVG4, C6EVG5, P43685	Kallikrein	78
7	37.7499997615814	34.1399997472763	34.1399997472763	C6EVG3	Hyaluronidase	36
8	34.5400005578995	34.1399997472763	34.1399997472763	C6EVG3	Hyaluronidase	32
9	51.1500000953674	51.1500000953674	51.1500000953674	C6EVG9, C6EVH0, P16354, P80003	Type III PLA2	60
10	70.279997587204	70.279997587204	70.279997587204	C6EVG9, C6EVH0, P16354, P80003	Type III PLA2	154
11	36.4499986171722	36.4499986171722	36.4499986171722	C6EVG9, C6EVH0, P16354, P80003	Type III PLA2	192
12	73.089998960495	73.089998960495	73.089998960495	C6EVG9, C6EVH0, P16354, P80003	Type III PLA2	169
13	30.0799995660782	29.6900004148483	26.1700004339218	C6EVG9, C6EVH0, P16354, P80003	Type III PLA2	41
14	57.6799988746643	56.8499982357025	56.8499982357025	C6EVG9, C6EVH0, P16354, P80003	Type III PLA2	89
15	33.3299994468689	33.3299994468689	33.3299994468689	C6EVG9, C6EVH0, P16354, P80003	Type III PLA2	218
16	58.8599979877472	56.1600029468536	55.8600008487701	C6EVG9, C6EVH0, P16354, P80003	Type III PLA2	127
17	56.4599990844727	56.4599990844727	54.6500027179718	C6EVG9, C6EVH0, P16354, P80003	Type III PLA2	219
18	34.1899991035461	34.1899991035461	34.1899991035461	C6EVG4, C6EVG5, P43685	Kallikrein	284
19	34.1899991035461	34.1899991035461	34.1899991035461	C6EVG4, C6EVG5, P43685	Kallikrein	238
20	22.7899998426437	21.6499999165535	21.6499999165535	C6EVG4, C6EVG5, P43685	Kallikrein	29
21	16.5700003504753	16.5700003504753	16.5700003504753	C6EVG9, C6EVH0, P16354, P80003	Type III PLA2	27
32.09	28.07	27.81	Translation_Of_HSUS_CL3Contig1	C6EVG0, Q91055	CRiSP	23
24	24.6199995279312	22.5700005888939	21.170000731945	A0A087R2N4	BPI fold	39
27	13.7099996209145	11.1199997365475	11.1199997365475	A0A087R2N4	BPI fold	10

## Sheet: Heloderma suspectum
N	%Cov	%Cov(50)	%Cov(95)	Uniprot	Toxin type	Peptides(95%)
1	27.68	27.68	27.68	C6EVG9, C6EVH0, P16354, P80003	Type III PLA2	50
2	68.63	68.63	68.63	C6EVG9, C6EVH0, P16354, P80003	Type III PLA2	229
3	32.76	32.76	32.76	P43685, C6EVG4, C6EVG5	Kallikrein	125
4	33.48	33.48	33.48	P43685, C6EVG4, C6EVG5	Kallikrein	210
5	34.19	34.19	34.19	P43685, C6EVG4, C6EVG5	Kallikrein	352
6	34.47	33.33	33.33	P43685, C6EVG4, C6EVG5	Kallikrein	263
7	33.33	33.33	33.33	P43685, C6EVG4, C6EVG5	Kallikrein	263
8	32.62	32.62	32.62	P43685, C6EVG4, C6EVG5	Kallikrein	230
9	32.62	31.91	31.91	P43685, C6EVG4, C6EVG5	Kallikrein	194
10	30.91	30.2	30.2	P43685, C6EVG4, C6EVG5	Kallikrein	104
11	59.27	58.87	58.47	P43685, C6EVG4, C6EVG5	Kallikrein	110
12	39.71	33.06	31.6	C6EVG9, C6EVH0, P16354, P80003	Type III PLA2	68
13	37.43	37.43	37.43	C6EVG9, C6EVH0, P16354, P80003	Type III PLA2	228
14	68.11	63.78	63.78	C6EVG9, C6EVH0, P16354, P80003	Type III PLA2	143
16	52.1399974822998	52.1399974822998	52.1399974822998	C6EVG0, Q91055	CRiSP	126
21	67.5	55	55	C6EVG3	Hyaluronidase	10
22	55.37	49.34	46.52	KP224275	Translation_Of_Hsu_RL11_c3044		63
23	48.8	48.8	48.45	P43685, C6EVG4, C6EVG5	Kallikrein	40
24	30.35	30.35	30.35	KP224276	BPI fold	85
